# Supplementary material
Source: MDPI journal article supplement (https://www.mdpi.com/2673-706X/4/1/5)
Supplement: s1 [file s1]

Archive with 3 entries (3 files):
- nanoenergyadv-2728419-supplementary.pdf
- Video S1.mp4
- Video S2.mp4
